# Supplementary material for: Protease Responsive Nanogels for Transcytosis across the Blood−Brain Barrier and Intracellular Delivery of Radiopharmaceuticals to Brain Tumor Cells
Source: PubMed Central journal article supplement — Adv Healthc Mater. 2021 Sep 6;10(20):2100812. doi: 10.1002/adhm.202100812 (PMC11468667; doi:10.1002/adhm.202100812), 2021-09-06
Supplement: ADHM-10-2100812-s001.pdf [file ADHM-10-2100812-s001.pdf]

# ADVANCED HEALTHCARE MATERIALS

## Supporting Information

for *Adv. Healthcare Mater.*, DOI: 10.1002/adhm.202100812

Protease responsive nanogels for transcytosis across the blood brain barrier and intracellular delivery of radiopharmaceuticals to brain tumor cells

*Smriti Singh\* , ‡, Natascha Drude ‡, Lena Blank, Prachi Bharat Desai, Hiltrud Königs, Stephan Rütten, Karl-Josef Langen, Martin Möller, Felix M. Mottaghy, and Agnieszka Morgenroth\**

## Supporting Information

### Protease responsive nanogels for transcytosis across the blood brain barrier and intracellular delivery of radiopharmaceuticals to brain tumor cells

Smriti Singh\*<sup>‡</sup>, Natascha Drude<sup>‡</sup>, Lena Blank, Prachi Bharat Desai, Hiltrud Königs, Stephan Rütten, Karl-Josef Langen, Martin Möller, Felix M. Mottaghy, and Agnieszka Morgenroth\*

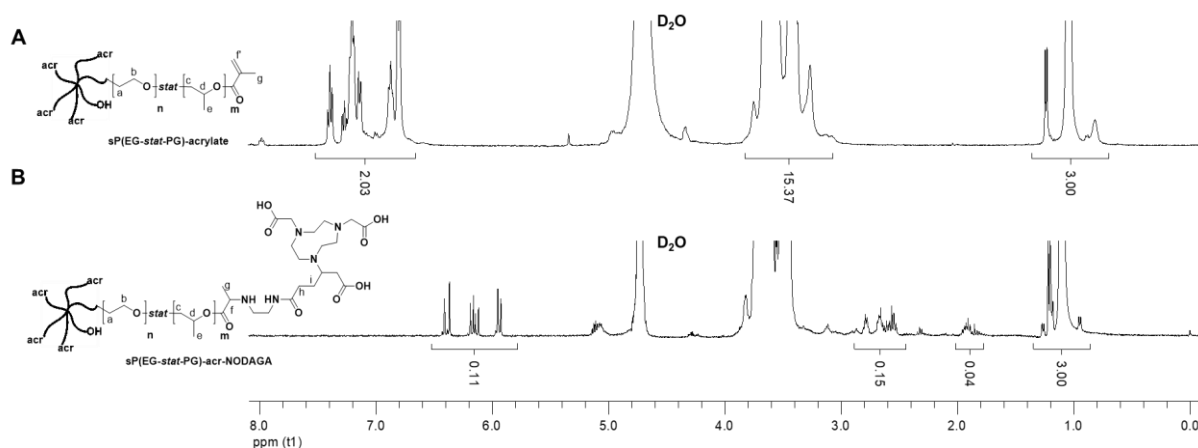

**Figure S1.** <sup>1</sup>H NMR (400 MHz) of sP(EG-stat-PG)-acr-NODAGA in D<sub>2</sub>O. (A) sP(EG-stat-PG)-acrylate. (B) sP(EG-stat-PG)-acr-NODAGA after successful covalent linking of the chelator (NODAGA) to the pre-polymer structure.

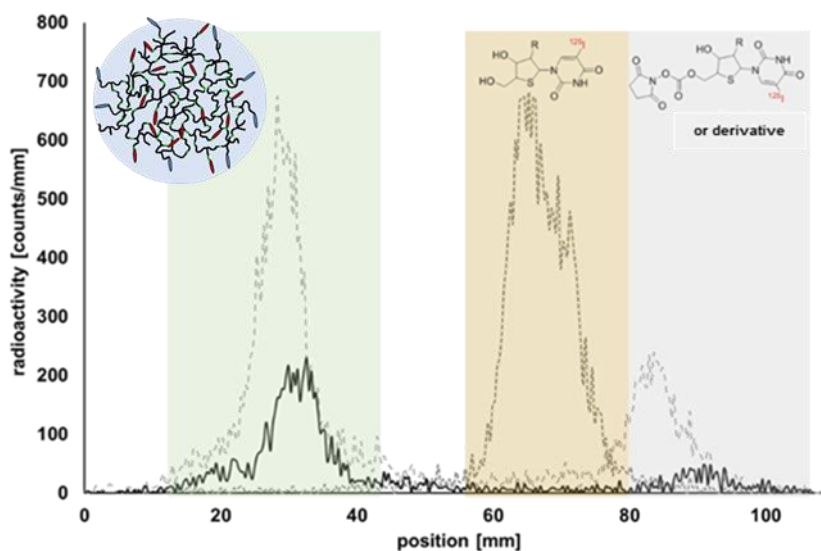

**Figure S2.** Quality control of ITdU-NG. Excess of low molecular weight byproducts was removed via PD-10 desalting column; Thin layer chromatograph of [<sup>125</sup>I]ITdU-nanogels

before purification (dashed line) and after purification (PD-10) (black line) and of sole [<sup>125</sup>I]ITdU (stationary phase: TLC Silica gel 60, mobile phase: ethanol: H<sub>2</sub>O: acetonitrile (8:1:1)).

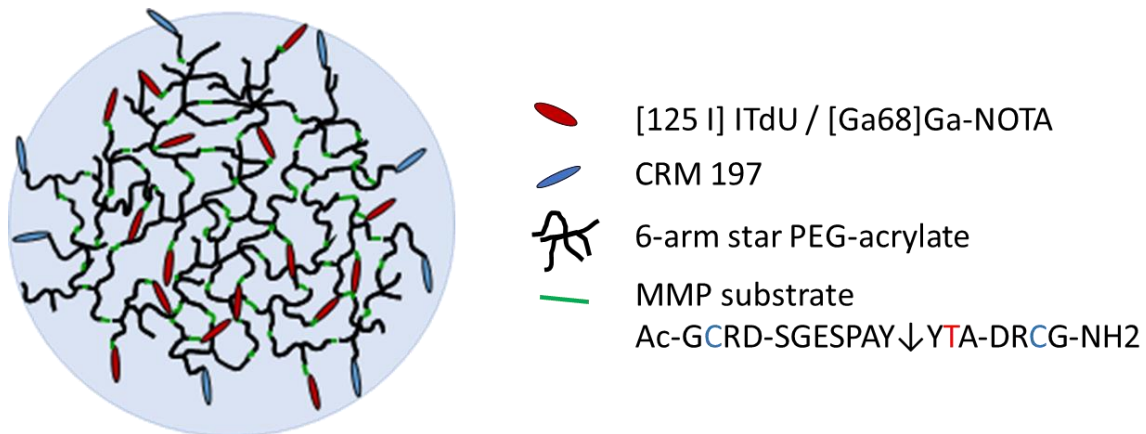

**Figure S3.** Illustration of nanogels modified with CRM-197 and cross-linked with MMP-substrate (blue cysteine; red tyrosine) for cross-linking and functionalization for radioactive labeling.

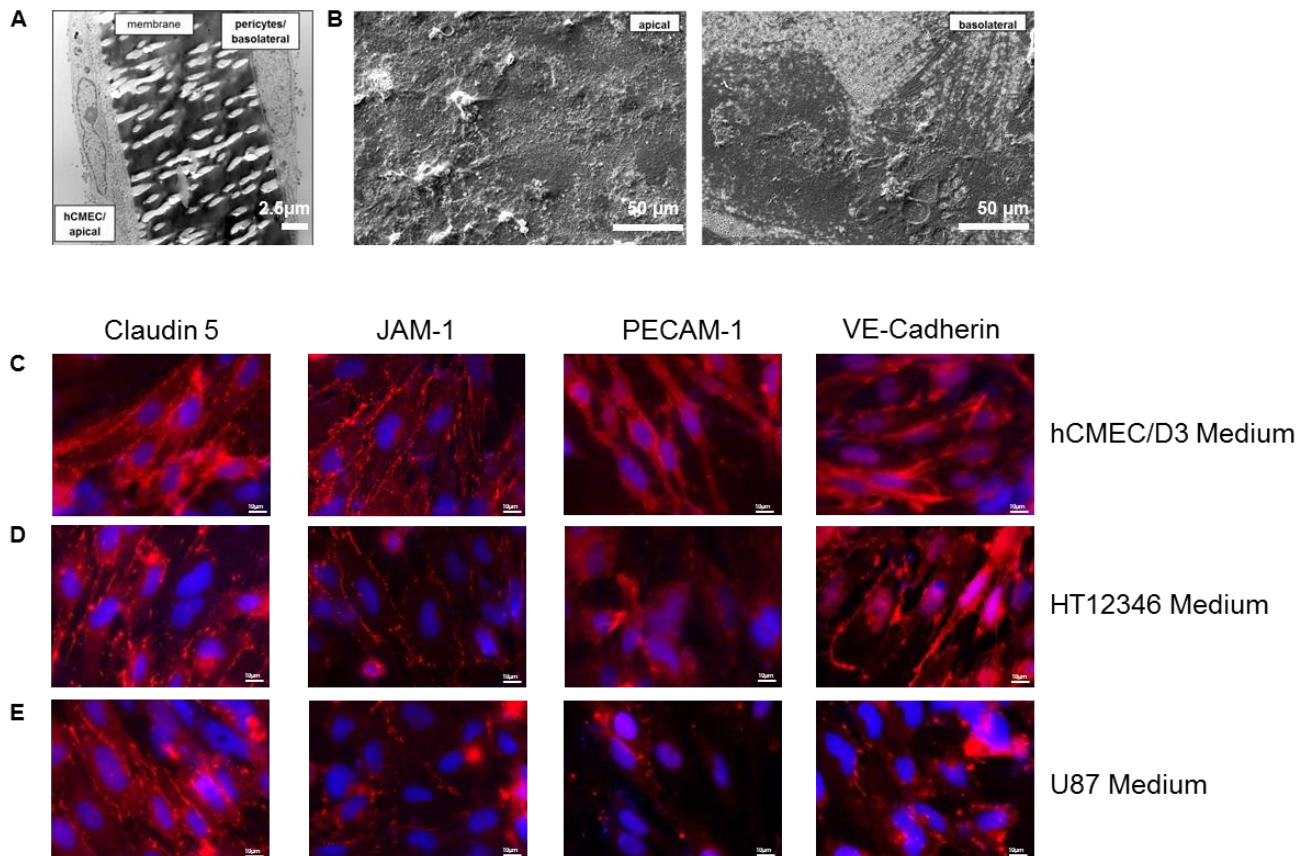

**Figure S4.** The integrity of the blood brain barrier *in vitro* model. (A) TEM image of an intact BBB with hCMEC cells seeded on a collagen matrix onto the membrane of the insert and pericytes on the basolateral side of the insert; REM images of (B) apical (hCMEC/D3) and basolateral (pericytes) side of the membrane. (C-E) Expression of tight junction proteins in hCMEC cells in (C) mono-culture, (D) co-culture with HT 12346 and (E) co-culture with U-87 cells (3 days).

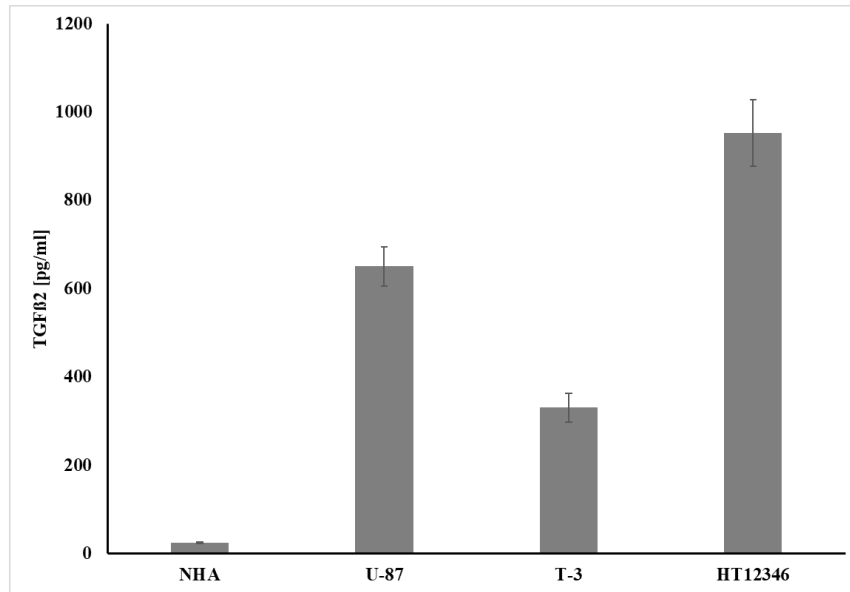

**Figure S5.** TGFβ2 secretion by NHA and glioblastoma cells was quantified using ELISA. TGFβ2 concentration was evaluated in the cell culture supernatants and calculated as pg/ml medium (n = 5).

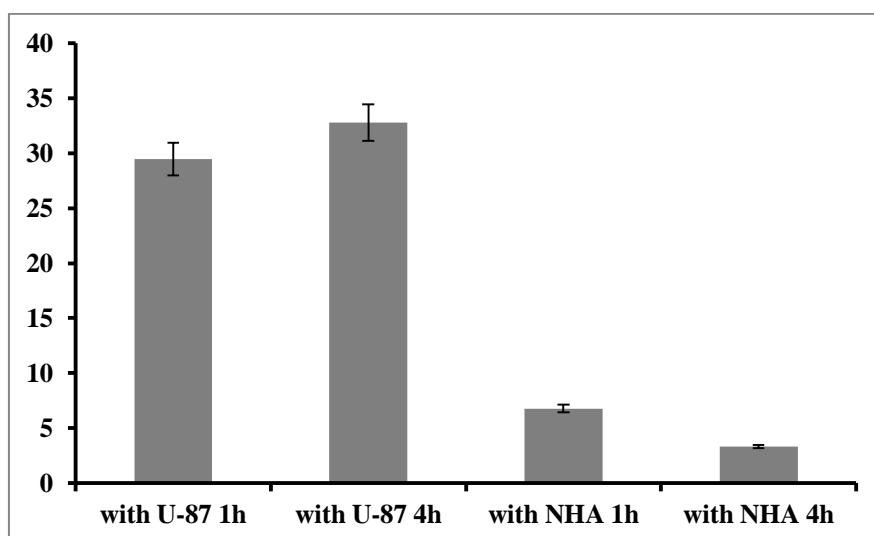

**Figure S6.** Drug release from [<sup>125</sup>I]ITdU-CRM-197-nanogel in cell culture media of U-87 and NHA after 1 h and 4 h incubation time (n = 5).
